1        **Excess weight mediates changes in HDL pool that reduce cholesterol efflux capacity**  
2        **and increase antioxidant activity**

3        Jose Carlos de Lima-Junior<sup>1</sup>, Vitor W.M. Virginio<sup>1</sup>, Filipe A. Moura<sup>1,2</sup>, Adriana Bertolami<sup>3</sup>,  
4        Marcelo Bertolami<sup>3</sup>, Otavio R Coelho-Filho<sup>4</sup>, Ilaria Zanotti<sup>6</sup>, Wilson Nadruz<sup>4</sup>, Eliana Cotta  
5        de Faria<sup>5</sup>, Luiz Sergio F. de Carvalho<sup>1,4</sup>, Andrei C Sposito<sup>1,4</sup>

6        1. Laboratory of Atherosclerosis and Vascular Biology, Faculty of Medical Sciences, State  
7        University of Campinas, São Paulo, Brazil

8        2. Department of Cardiology, Brigham and Women's Hospital, Boston, New England,  
9        United States

10       3. Department of Dyslipidemia, Dante Pazzanese Cardiological Institute, São Paulo, Brazil

11       4. Department of Internal Medicine, Cardiology Division, Faculty of Medical Sciences,  
12       State University of Campinas, São Paulo, Brazil

13       5. Lipids Laboratory, Department of Clinical Pathology, Faculty of Medical Sciences,  
14       State University of Campinas, Sao Paulo, Brazil

15       6. Department of Food and Drug, University of Parma, Parma, Italy

16       To whom correspondence should be addressed. E-mail: [andreisposito@gmail.com](mailto:andreisposito@gmail.com)

17       **Corresponding author:**

18       Andrei C Sposito

19       Cardiology Division, State University of Campinas

20       13084-971, Campinas, São Paulo, Brazil

21       [andreisposito@gmail.com](mailto:andreisposito@gmail.com)

22       **Running title:** Excess weight and HDL functions

23       The authors declare no conflict of interest.

24       **Keywords** - atherosclerosis; cholesterol efflux; HDL metabolism; HDL; obesity

25

26

27

28           **Abbreviations:** ALT, alanine aminotransferase; ApoA-I, apolipoprotein A-I; AST,  
29 aspartate aminotransferase; CE, cholesteryl ester; CEC, Cholesterol efflux capacity; CETP,  
30 cholesteryl ester transfer protein; cIMT, carotid intima-media thickness; FC, free cholesterol;  
31 HL, hepatic lipase; HOMA2 %  $\beta$ , Homeostasis model assessment 2 of beta-cell function;  
32 HOMA2-IR, Homeostasis model assessment 2 of insulin resistance; HOMA2 %S, Homeostasis  
33 model assessment 2 of insulin sensitivity; HUVEC, human umbilical vein endothelial cells;  
34 LCAT, Lecithin-cholesterol acyltransferase activity; PL, phospholipids; LPL, Lipoprotein  
35 lipase; PON, paraoxonase; TC, total cholesterol; PLTP, phospholipids transfer protein; VCAM-  
36 1, vascular cell adhesion molecule-1.

37

38

39

40

41

42

43

44

45

46

47

48

49

50

51           **Abstract:**

52           **Objective:** Obesity-related decline in high-density lipoprotein (HDL) functions such as  
53 cholesterol efflux capacity (CEC) has supported the notion that this lipoprotein dysfunction may  
54 contribute for atherogenesis among obese patients. Besides, potentially other HDL protective  
55 actions may be affected with weight gain and these changes may occur even before the obesity  
56 range.

57           **Methods:** Lipid profile, body mass index (BMI), biochemical measurements, and  
58 carotid intima-media thickness (cIMT) were obtained in this cross-sectional study with 899  
59 asymptomatic individuals. HDL functions were measured in a subgroup (n=101).

60           **Results:** Individuals with increased HDL-C had an attenuated increase in cIMT with  
61 elevation of BMI. CEC, HDL-C, HDL size and HDL-antioxidant activity were negatively  
62 associated with cIMT. BMI was inversely associated with HDL-mediated inhibition of platelet  
63 aggregation and CEC, but surprisingly it was directly associated with the antioxidant activity.  
64 Thus, even in non-obese, non-diabetic individuals, increased BMI is associated with a wide  
65 change in protective functions of HDL, reducing CEC and increasing antioxidant activity. In  
66 these subjects, decreased HDL concentration, size or function are related to increased  
67 atherosclerotic burden.

68           **Conclusion:** Our findings demonstrate that in non-obese, non-diabetic individuals, the  
69 increasing values of BMI are associated with impaired protective functions of HDL and  
70 concomitant increase in atherosclerotic burden.

71

72

73

74

75

76

77

78 **1. Introduction**

79 Presently, one in three individuals with excess weight will die from cardiovascular  
80 disease (CVD)[1, 2]. In fact, both obesity (BMI >30 kg/m<sup>2</sup>) and overweight (BMI of 25 to <30  
81 kg/m<sup>2</sup>) individuals are at increased risk of cardiovascular death as compared with those with  
82 BMI within the normal range (18.5 to <25 kg/m<sup>2</sup>)[3]. The proposed milieu for this interaction  
83 involves a spectrum of mechanisms in which phenotypic or functional changes in high-density  
84 lipoprotein (HDL) are involved [4].

85 The identification of HDL involvement in adiposopathy is not a recent issue. Since the  
86 metabolic syndrome was conceived, all clinical criteria for its diagnosis included low levels of  
87 plasma HDL-cholesterol (HDL-C) as a marker of metabolically, unhealthy obesity. In the  
88 mechanistic point of view, the combination of increased substrate, such as triglyceride-rich  
89 lipoproteins, and increased activity of HDL remodeling proteins, such as cholesteryl ester  
90 transfer protein (CETP), and hepatic lipase (HL), coexists in overweight individuals as a result  
91 of insulin resistance, promoting a reduction in HDL concentration, size and its content of  
92 apolipoproteins AI (ApoA-I). In addition, a decrease in the overall cholesterol efflux capacity  
93 (CEC) has been reported in obese subjects [5], despite the increased ABCA1-mediated  
94 cholesterol efflux[6].

95 Besides CEC, HDL also mediates several other anti-atherosclerotic mechanisms, such  
96 as antioxidant, anti-inflammatory activities and inhibition of platelet aggregation, whose extent  
97 is sensitive to phenotypic changes of the particles, such as those described above. If this is so,  
98 more than the reduced capacity as free cholesterol acceptor, an overall dysfunction in the HDL  
99 system may follow weight gain [7]. Furthermore, as the magnitude of these phenotypic changes  
100 in HDL occurs in parallel with the increase in BMI, it is possible that a cluster of particle  
101 dysfunctions occurs earlier with the weight gain, possibly even before the criterion for  
102 overweight. Hence, a metabolic legacy related to HDL may contribute to the future CVD risk.  
103 In order to shed some light on these gaps, we designed this study to evaluate the impact of BMI

104 on the interaction between HDL concentration and functions with atherosclerotic burden in pre-  
105 obese individuals.

## 106 **2. Materials and methods**

### 107 **2.1. Cross-sectional study description**

108 We evaluated a sample of 899 asymptomatic individuals who were seen in two primary  
109 care centers between 2008 and 2013: the outpatient clinic at Dante Pazzanese Institute of  
110 Cardiology, São Paulo (SP), Brazil, and governmental primary care centers of the city of  
111 Campinas, SP, Brazil. Inclusion criteria were: (1) no manifested atherosclerotic CVD; (2) no  
112 diagnosis of type 2 diabetes based on antidiabetic treatment, fast blood glycemia  $\geq 126$  mg/dL,  
113 glycated hemoglobin  $\geq 6.5\%$  or glycemia  $\geq 200$  mg/dL on 120-minutes oral tolerance test and (3)  
114 age between 20 and 75 years old. We excluded individuals with (1) uncontrolled hyper (thyroid  
115 stimulating hormone (TSH)  $< 0.41 \mu\text{UI/mL}$  or free thyroxin  $> 1.8 \text{ ng/dL}$ ) or hypothyroidism  
116 (TSH  $> 4.50 \mu\text{UI/mL}$  or free thyroxin  $< 0.9 \text{ ng/dL}$ ); (2) antidiabetic medications; (3) liver disease,  
117 as indicated by ALT or AST over two times the upper limit; (4) urea  $> 40 \text{ mg/dL}$ ; (5) glomerular  
118 filtration rate  $\leq 60 \text{ mL/min/1.73m}^2$ ; (6) heart failure NYHA stage  $\geq \text{III}$ ; (7) HIV positive or (8)  
119 withdrawal of informed consent. Patients underwent clinical examination, as well as  
120 biochemical analysis. Subclinical atherosclerosis was measured in all patients up to a month  
121 after being included. The study was approved by the local institutional ethical committee of the  
122 Instituto Dante Pazzanese de Cardiologia (registration number 3852/2009). It is also registered  
123 at ClinicalTrials.Gov by the identification NCT02487615. All patients provided written and  
124 informed consent forms before taking part in the study. The study protocol conforms to the  
125 ethical guidelines of the 1975 Declaration of Helsinki.

126 A sub-analysis testing functions and characteristics of HDL was performed in  
127 consecutive sample of 101 individuals from the enrolled participants in the governmental  
128 primary care centers of the city of Campinas. The study was approved by the local institutional  
129 ethical committee of the Hospital das Clínicas of the State University of Campinas (registration  
130 number 1260/2010). It is registered at ClinicalTrials.Gov by the identification NCT02106013.

131 All patients provided written and informed consent forms before taking part in the study. The  
132 study protocol conforms to the ethical guidelines of the 1975 Declaration of Helsinki.

### 133 **2.2. Biochemical analysis**

134 Blood samples were drawn after a 12-hour fasting period. The following biochemical  
135 measurements were performed: triglycerides, total cholesterol, HDL-C, creatinine, c-reactive  
136 protein (CRP), insulin, glucose, and insulin. LDL-C was calculated using Friedewald's  
137 equation. Glomerular filtration rate was calculated by the CKD-EPI equation. HOMA2 % S,  
138 HOMA2-IR and HOMA2 $\beta$  were calculated using computer models [8].

### 139 **2.3. Carotid artery ultrasound**

140 Carotid Doppler ultrasound was performed using high-resolution Vivid 7 ultrasound  
141 (GE, USA) and high-frequency linear transducer (9 MHz) with automatic border recognizer  
142 detection as described previously in Bertolami et al [9]. Briefly, the cIMT was obtained by  
143 means of image processing of B-mode ultrasonograms of the right and left automatic  
144 measurement. High-resolution B-mode ultra-sonographic imaging was performed initially  
145 evaluating the common carotid artery with antero-oblique insonation above the clavicle and  
146 alongside the internal carotid artery, as standardized procedure[10]. Measurement of cIMT was  
147 obtained 20 mm proximally from the carotid bifurcation as the distance between the lumen-  
148 intima interface and the media-adventitia interface[11].

### 149 **2.4. Lipoprotein isolation**

150 LDL was isolated from a pool of normolipidemic sera from 20 volunteers, through  
151 sequential ultracentrifugation using a Beckman L8-M ultracentrifuge (Beckman Coulter Inc.,  
152 Palo Alto, USA), with a 75Ti fixed angle rotor (Havel, 1955 #11). HDL was isolated from each  
153 study participant through density gradient ultracentrifugation[12] with the use of a SW41Ti  
154 rotor. Isolated lipoproteins were extensively dialyzed against EDTA-free PBS for 24h, at 4°C, in  
155 a dark room. All assays were performed in freshly isolated lipoproteins that were kept at 4°C for  
156 a maximum period of 15 days.

### 157 **2.5. HDL chemical composition and molar concentration measurements**

158 HDL chemical composition was measured using commercially available enzymatic kits,  
159 in the microplate reader Power Wave XS (BioTek®, Winooski, USA). Total proteins (Pierce™  
160 BCA Protein Assay Kit, Thermo Scientific, Rockford, USA), TC (CHOD-PAP, total  
161 cholesterol, Roche Diagnostics® reagents, Mannheim, Germany), FC (Free Cholesterol E,  
162 Wako Chemicals, Richmond, USA), PL (Phospholipids C, Wako Chemicals, Richmond, USA),  
163 TG (TG, GPO-PAP, Roche Diagnostics® reagents, Mannheim, Germany) and ApoA-I (TINA  
164 QUANT APOA1 V2, Roche Diagnostics® reagents, Mannheim, Germany) were measured,  
165 while CE was calculated according to the following formula:  $(TC-FC) \times 1.67$ [12]. The relative  
166 content of ApoA-I (HDL-ApoA-I) or lipids in HDL was calculated based on their proportion to  
167 the total mass of HDL, calculated as the sum of FC, PL, TG, CE, and total proteins. HDL molar  
168 concentration was estimated based on particle total mass and molecular weight[12].

## 169 **2.6. HDL physical-chemical characterization**

170 HDL particle size was determined using dynamic light scattering, in a Nanotracs Particle  
171 Size Analyser 250 (Microtracs Inc., Montgomeryville, USA)[13]. Zeta potential was determined  
172 in HDL diluted 1:10 in KCl 10mM, using laser Doppler micro-electrophoresis, in the Zetasizer  
173 Nano ZS (Malvern Instruments, Malvern, UK).

## 174 **2.7. Determination of proteins involved in HDL metabolism**

175 CETP and PLTP activities were measured using exogenous radiometric assays, as  
176 previously described[14, 15]. LPL and HL activities were measured in fasted post-heparin  
177 plasma samples, collected 15min after the intravenous administration of heparin (100U/kg body  
178 weight), in an assay based on fatty acid release from a radiolabeled triolein emulsion[16]. LCAT  
179 activity was determined using recombinant HDL, according to standardized method [17]. PON  
180 activity was measured using paraoxon (diethyl-p-nitrophenylphosphate, Sigma, St. Louis, MO,  
181 USA) as substrate [18].

## 182 **2.8. HDL antioxidant activity**

183 HDL antioxidant activity was measured in a kinetic fluorimetric assay adapted from  
184 Navab et al[19]. Oxidation was monitored as changes in the fluorescence intensity of 2',7'-  
185 dichlorofluoresceine (DCFH). For the antioxidant activity assays, LDL (final concentration,

186 20mgTC/dL) and CuSO<sub>4</sub> (final concentration, 0.5μM) were added to DCFH-containing tubes  
187 (final concentration, 2mg/mL), followed by the addition or not of HDL (final concentration,  
188 15mg total mass/dL). The volume was adjusted to 100μL with Chelex treated-PBS and the  
189 reaction mixture transferred onto a black 96-well microplate. The plate was covered with an  
190 optical adhesive cover to avoid evaporation and incubated at 37°C. Fluorescence intensity was  
191 measured over 24h with 15-minute intervals in a fluorescence microplate reader (Spectra Max  
192 M5; Molecular Devices, Sunnyvale, USA) at an excitation wavelength of 485nm, emission  
193 wavelength of 540 nm, and cut-off of 530nm. Results of antioxidant activity are presented as the  
194 percentage of inhibition of LDL oxidation in the presence of each subject's HDL when  
195 compared to control wells (LDL alone).

## 196 **2.9. HDL anti-inflammatory activity**

197 HDL's anti-inflammatory activity was measured in HUVEC in an assay adapted from  
198 Besler et al[20]. Cells were cultured in RPMI 1640 medium containing 10% fetal calf serum,  
199 penicillin, and streptomycin and maintained in a 5% CO<sub>2</sub> incubator at 37°C. After reaching  
200 confluence, they were plated in 24-well culture plate (3 x 10<sup>5</sup> cells/well, and incubated with  
201 TNF-α (1ng/mL), with or without HDL (50μg ApoA-I/mL) for three hours. The culture media  
202 were collected and stored at -80°C. Due to the low VCAM-1 concentrations, samples were  
203 concentrated using the Amicon® Ultra Centrifugal Filters, 50K (Millipore, Massachusetts,  
204 USA) and then VCAM-1 concentrations were measured using the Human VCAM-1 ELISA Kit  
205 (Cat number ECM340, Millipore, Massachusetts, USA). Results are expressed as the percentage  
206 of decrease in VCAM-1 concentrations in the wells incubated with HDL when compared to the  
207 control wells without HDL.

## 208 **2.10. Cholesterol efflux capacity (CEC) assay**

209 Global cellular CEC was performed using J774 macrophages enriched with acetylated  
210 LDL and <sup>14</sup>C-cholesterol and HDL as the cholesterol acceptor[21]. In summary, J774  
211 macrophages were cultured in RPMI 1640 medium containing 10% fetal calf serum, penicillin,  
212 and streptomycin and maintained in a 5% CO<sub>2</sub> incubator at 37°C. After reaching confluence,  
213 cells were plated in a 96-well plate (1.25 x 10<sup>5</sup> cells/well, and enriched with acetylated LDL (50



214  $\mu\text{g/mL}$ ) and  $^{14}\text{C}$ -free cholesterol ( $0.3\mu\text{Ci} / \text{mL}$ ). After 48h, cells were washed with PBS  
215 containing fatty acid-free albumin (FAFA) and equilibrated with DMEM containing FAFA for  
216 24 hours. The cells were then washed twice and incubated with HDL ( $50\mu\text{g ApoA-I/mL}$ ) for 8  
217 hours. Media were collected and the radioactivity measured in a beta-scintillation counter. Cells  
218 were rinsed twice with cold physiologic saline and the intracellular lipids extracted with hexane:  
219 isopropanol (3:2, v/v). Solvent was evaporated and radioactivity measured. The percentage of  
220  $^{14}\text{C}$ -CEC was calculated as ( $^{14}\text{C}$ -cholesterol in the medium/ $^{14}\text{C}$ -cholesterol in cells+medium)  
221  $\times 100$ .

### 222 **2.11. HDL-mediated platelet aggregation inhibition**

223 HDL ability to inhibit platelet aggregation was measured as described by Valiyaveetil  
224 et al[22]. HDL ( $0.8\text{mg protein/mL}$ ) was mildly oxidized by dialysis against PBS +  $5\mu\text{M CuSO}_4$ ,  
225 for 24h at  $37^\circ\text{C}$ . Citrated blood was drawn from a healthy donor and platelet-rich plasma (PRP)  
226 obtained by centrifugation at 800rpm for 15 minutes. PRP was then incubated with native or  
227 oxidized HDL ( $0.5 \text{ mg/mL}$ ) for 30 minutes at  $37^\circ\text{C}$ . Platelet aggregation was monitored using a  
228 Lumi-Aggregometer type 500 VS (Chrono-log, Havertown, USA) for 6 minutes after the  
229 addition of ADP ( $5\mu\text{M}$ ). Results are expressed as percentage of the inhibition of platelet  
230 aggregation induced by oxidized compared to native HDL.

### 231 **2.12. Statistical analysis**

232 The distribution of all variables was tested with Kolmogorov-Smirnov test. Jonckheere-  
233 Terpstra trend in one-tail test was used to evaluate demographic, clinical variables and HDL  
234 characterization among three groups clustered using BMI and expressed as median and  
235 interquartile range. ANCOVA was used to perform comparisons among groups involving  
236 enzymatic components of HDL adjusted for age, sex, and HOMA2 %S. Generalized linear  
237 models with type III sums of squares were used to assess interactions of BMI within the  
238 association between HDL functions and cIMT, the only outcome, adjusted for age, sex, HDL-C,  
239 BMI, and HOMA2 %S. HDL functions and HDL-C were modeled with generalized linear  
240 regression. The BMI effect on the cIMT among six HDL functions (HDL-C, HDL size,  
241 antioxidant activity, CEC, HDL-mediated platelet inhibition, and anti-inflammatory activity)

242 was evaluated with the use of interaction tests. We used complete case analysis to handle  
243 missing data. To construct the 3D surface plot 1, we included only HDL-C values between  
244 40mg / dL and 100mg / dL; HDL size between 7.0 nm and 9.5 nm; CEC between 8% and 20%;  
245 antioxidant activity between 0 and 100%. For the remainder of the regression analyzes, we used  
246 the entire sample size of the sub-sample of 99 individuals. Two-sided  $p \leq 0.05$  were considered to  
247 indicate statistical significance. Analyses were performed using IBM SPSS<sup>®</sup> version 21.0  
248 statistical software. Scatter plot was performed using GraphPad Prism version 7.0 for Mac,  
249 GraphPad Software, La Jolla California USA, [www.graphpad.com](http://www.graphpad.com)". Polinomial splines were  
250 used to evaluate the relation between BMI or carotid IMT vs CEC or Antioxidant activity or a  
251 compound variable, after transforming CEC and Antioxidant activity into positive z-scores. The  
252 compound variable (Z-Efflux + Z-Antioxidant activity) was defined by the sum of z-scores for  
253 CEC and antioxidant activity. In order to avoid overfitting, we excluded extreme values at x-  
254 axis (<5th percentile and >95%percentile) and smoothing parameters for polinomial derivation  
255 (degrees of freedom [df] and lambda) were defined after cross validation. Spline curves were  
256 performed in R software, version 3.2.1 (R Foundation for Statistical Computing). We used  
257 MATLAB<sup>®</sup> (version 4.10, The MathWorks, Inc, Apple Hill Drive Natick, MA) to fit a 3D  
258 curve using second polynomial least square surface.

259

### 260 **3. Results**

#### 261 ***3.1. Overall study participants characteristics***

262 The baseline characteristics of participants are shown in Table 1 stratified by BMI status  
263 (n=899). The female gender prevailed among the participants and BMI values were associated  
264 with waist circumference, increased cIMT and impaired metabolic parameters; *i.e.* lower HDL-  
265 C, Apo-AI and HOMA2%S, as well as higher triglycerides, insulin and fasting glucose.  
266 Similarly, a stepped increase in LDL-C and total cholesterol was also noted with increasing  
267 BMI.

#### 268 ***3.2. Association between BMI, HDL-C and cIMT***

269 In the whole studied sample (n=899), multivariable linear regression analyses adjusted for  
270 BMI, age, gender, and plasma insulin or HOMA2-IR, confirmed the association between cIMT  
271 and HDL-C ( $\beta=-0.11$ ; 95%CI=-0.020;0.000;  $p=0.03$ ) and identified the existence of a  
272 significant interaction of BMI upon this association ( $\beta=-1.80$ ;  $p<0.0001$ ). To visualize the  
273 pattern for such BMI interaction, 3D surface plots were applied based on second polynomial  
274 least square regression (Figure 1). As shown in the Figure 1A, in subjects with increased BMI,  
275 reduced HDL-C levels were associated with increased cIMT. In contrast, in those individuals  
276 with reduced BMI, no clear association was found between HDL-C and cIMT. In order to  
277 provide a deeper assessment of this interaction, a broad spectrum of HDL functions was  
278 investigated in a subgroup of these individuals. As it would be expected, an inverse association  
279 was found between BMI and HDL-C (Spearman's rho -0.028,  $p < 0.0001$ ) and HDL size  
280 (Spearman's rho -0.175,  $p < 0.0001$ ).

### 281 *3.3. Association between BMI, HDL functions and cIMT in the subgroup analyses*

282 The subgroup characteristics are shown on Table 2. In the subgroup, we found a stepped  
283 decrease of total HDL mass, HDL size, and HDL content in triglyceride, free cholesterol,  
284 cholesteryl ester, and phospholipid across BMI categories (Table 3). PON activity adjusted for  
285 the total number of HDL particles, *i.e.* PON/HDL-C ratio, increased in parallel with BMI  
286 categories. There was no relation between BMI categories and activities of PLTP, LCAT, HL or  
287 LPL (Table 3).

288 In line with previous studies, as shown in Figure 2A (linear beta -0.38, polynomial  
289  $R^2=0.19$ ,  $p=0.001$ ; Spearman's rho -0.32,  $p<0.001$ ), we reported a progressive decline in CEC  
290 as BMI increases. In contrast, we found a progressive increase in HDL antioxidant activity  
291 which was proportional and reciprocal as compared with CEC (linear beta +1.38, polynomial  
292  $R^2=0.12$ ,  $p=0.04$ ) (Figure 2B). Both changes were mainly mediated by the HDL size which is  
293 inversely related to weight gain. Based on this assumption, the compound variable of z-  
294 transformed efflux plus antioxidant activity should remain approximately constant as HDL size  
295 changes due to excess weight ( $p$  value 0.75) (Figure 2C). Increasing values of the compound

296 variable were associated lower carotid IMT (linear beta -0.10, polynomial R<sup>2</sup>=0.26, p<0.001)  
297 (Figure 2D). Still, correlation analyses were made between BMI and HDL functions. An inverse  
298 association was also found with HDL-mediated platelet inhibition (Spearman's rho -0.157, p <  
299 0.03). No correlation was found between BMI and HDL anti-inflammatory activity (Spearman's  
300 rho -0.009, p < 0.904) nor between each of the HDL functions.

301 Since both the abundance of substrate, *i.e.* triglyceride-rich lipoproteins, and the activities of  
302 transport proteins are potentially involved in the effect of excess weight on HDL phenotype,  
303 multivariate linear regression models were applied to estimate the influence of intravascular  
304 HDL-remodeling proteins, *i.e.* CETP, LPL, HL, LCAT and PLTP on HDL size. CETP ( $\beta$ =-0.12;  
305 95%CI=-0.30;-0.01; p=0.030), HL ( $\beta$ =-0.28; 95%CI=-0.35;-0.12; p<0.0001) and LCAT ( $\beta$ =-  
306 0.36; 95%CI=-0.28;-0.13; p<0.0001) were drivers for HDL size. HDL size was also associated  
307 with plasma triglycerides ( $\beta$ =-0.17; 95%CI=-0.06;-0.02; p<0.001), HOMA2-IR ( $\beta$ =0.21;  
308 95%CI=0.01;0.42; p=0.001), PON activity/HDL-C ( $\beta$ =-0.33; 95%CI=-0.47;-0.13; p<0.0001)  
309 and HDL-mediated antioxidant activity ( $\beta$ =-0.70; 95%CI=-0.81;-0.12; p=0.009). Association  
310 was found between HOMA2-IR and HDL-mediated antioxidant activity ( $\beta$ =-2.1; 95%CI=-  
311 3.66;-0.60; p=0.007).

312 In order to estimate the association between HDL functions and cIMT, we used multiple  
313 linear regression with adjustments for the following confounders (BMI, age, sex, HDL-c and  
314 insulin), which were selected based on univariate significance or clinical relevance (age, sex)  
315 (Table 4). We observed a negative association between CEC and cIMT, which remained  
316 significant after initial adjustment for the same confounders above, or even after adjustment for  
317 HDL size ( $\beta$ =-0.18; 95%CI=-0.138; -0.011; p=0.02), antioxidant activity ( $\beta$ =-0.19; 95%CI=-  
318 0.003;0.000; p=0.04) and PON activity/HDL-C ( $\beta$ =-0.16; 95%CI=-0.065;-0.002; p=0.02). The  
319 antioxidant activity of HDL was also inversely related to cIMT. Anti-inflammatory activity,  
320 PON activity/HDL-C and HDL-mediated platelet inhibition were not associated with cIMT in  
321 an adjusted model.

322 Interactions of BMI were found within the linear associations between cIMT and CEC  
323 (p=0.03), and cIMT and antioxidant activity (p=0.04). Although the 95% CI suggests a tendency

324 towards a moderating effect of the BMI on the association between HDL size and cIMT, this  
325 interaction did not reach statistical significance ( $p=0.13$ ) (Fig. 1B). As displayed in Fig 1C, the  
326 inverse association between CEC and cIMT seems to increase in parallel with BMI values. In  
327 contrast, as shown in Fig 1D, the inverse association between cIMT and antioxidant activity of  
328 HDL increases with increasing BMI. In fact, the correlation between cIMT and antioxidant  
329 activity is greater in individuals with BMI above the median ( $23.6 \text{ kg/m}^2$ ) ( $r=-0.33$ ;  $p=0.037$ )  
330 than in their counterparts ( $r=-0.2$ ;  $p=0.05$ ) while the correlation between CEC and cIMT is equal  
331 in both subgroups (above,  $r=-0.28$ ;  $p=0.042$ ; below,  $r=-0.28$ ;  $p=0.016$ ).

332

#### 333 **4. Discussion**

334

335 Recent data have shown that the predictive value of HDL-C for estimating the risk of  
336 cardiovascular events declines after CVD manifestation[23]; a failure that has been attributed to  
337 the increased generation of dysfunctional HDL in a setting of chronic or acute disease. As  
338 pointed out in subjects with CVD, we hypothesized that excess weight may influence the  
339 relationship between HDL-C and the risk of atherosclerotic disease. After confirming this  
340 hypothesis, we moved forward investigating whether more subtle changes in the HDL system  
341 could occur in overweight individuals and whether this could justify a change in the association  
342 pattern between HDL-C and atherosclerotic disease. Taken together, our findings revealed the  
343 following evidence: (i) the pattern of association between HDL-C and cIMT differs according to  
344 the presence or absence of excess weight; (ii) increased BMI is associated with the simultaneous  
345 change of multiple anti-atherosclerotic functions of HDL, including CEC and antioxidant  
346 activity; (iii) the existing association between excess weight and carotid atherosclerotic burden  
347 is in part attributable to HDL dysfunction; and (iv) HDL-mediated inhibition of platelet  
348 aggregation declines with excess weight.

349 To the best of our knowledge, only few studies have previously assessed the impact of  
350 body weight on HDL function in non-obese individuals and none used a simultaneous  
351 assessment of multiple functions. In this clinical setting, CEC has been the main HDL function

352 assessed, which was investigated in interventional [3], case-control[24] and cross-sectional [5]  
353 studies. In a large nested case-control study from the EPIC-Norfolk cohort, for example,  
354 discrete changes in BMI in the overweight range was inversely correlated with CEC [24]. On  
355 this specific aspect, our results are in line with previous studies.

356 Weight gain promotes a wide range of metabolic changes, among which insulin  
357 resistance is the cornerstone for CVD risk. As a result of insulin resistance, for example, there is  
358 an increase in the fatty acid efflux and in the activities of CETP and HL leading to a reduction  
359 in HDL size, an increase in the ApoA-I catabolic rate and a reduction in CEC[5, 25, 26]. In  
360 contrast with the evidence in obese subjects [27-29], our study did not identify changes in CETP  
361 and HL activities across BMI categories although their activities were associated with HDL size  
362 change. Thus, at this stage of excess weight, the biochemical and size changes in HDL particles  
363 is more likely a consequence of increased substrate for HDL particle remodeling, *i.e.* increased  
364 plasma concentration of triglyceride-rich lipoproteins.

365 These changes in the HDL system have traditionally been reported as a component  
366 cause for the increased risk of CVD in obese individuals[30]. In those who are overweight but  
367 below the obesity threshold, we revealed a similar scenario, *i.e.* insulin resistance inversely  
368 relates with overweight, HDL size and CEC. It is interesting to note that these changes occurred  
369 even before the threshold for overweight as defined by World Health Organization (WHO).  
370 Thus, according to previous translational studies[31] or actuarial analyzes based on  
371 observational cohorts[32], our data support the concept that the threshold for pathogenic body  
372 mass is probably below the WHO definition.

373 Although it is clear that there is functional impairment, it is plausible that the change in  
374 the HDL phenotype would have an adaptive biological purpose motivated by the chronic  
375 increase of oxidative stress and by low-grade systemic inflammation. Similar reduction of HDL  
376 size has been reported in individuals who exhibit acute phase response, such as in myocardial  
377 infarction[33] and sepsis[34]. In these conditions, the reduction of HDL size is associated with a  
378 greater capacity to mitigate the oxidative stress. In agreement with this and consistent with  
379 previous studies, HDL size was inversely associated with increased antioxidant and PON

380 activities[35]. Interestingly, the predominance of small HDL (7.3-8.2 nm) in this cohort was  
381 associated with an attenuated impact of BMI on cIMT. Hence, overweight-induced remodeling  
382 in HDL simultaneously promoted the reduction of an anti-atherosclerotic mechanism, i.e. CEC,  
383 and the increase of another, i.e. antioxidant activity, suggesting a biological response of the  
384 HDL system to the predominant pro-atherosclerotic stimulus. Besides, the present study shows  
385 that estimates of the magnitude of HDL participation in the CVD risk in excess weight are  
386 naturally imprecise unless a broad range of anti-atherosclerotic functions is simultaneously  
387 investigated.

388 Obesity is clearly shown to be a prothrombotic state resulting from a combination of  
389 increased thrombin generation, platelet hyperactivity and decreased fibrinolysis[36]. Increased  
390 platelet reactivity is the result of the interaction between multiple characteristics grouped into  
391 obesity, including inflammation, oxidative stress, insulin resistance and adiposopathy with  
392 change in adipokine secretion pattern. Our study added to this state of knowledge, a new  
393 mechanism of imbalance in platelet activity; inhibition of HDL-mediated platelet aggregation  
394 was inversely associated with BMI. This finding should be considered in the set of  
395 prothrombotic changes of excess weight and as one of the mechanisms by which there is an  
396 increase in the incidence of cardiovascular events in these individuals.

397 Among the main limitations in the present study lies the fact that it is based on a cross-  
398 sectional design. In addition, due to the intensive laborious methodology involved in studying a  
399 full breadth of HDL function and metabolic pathways, we may have not been able to maintain  
400 the desired statistical power obtained as when the entire studied population was analyzed. In  
401 spite of this, it does provide us a unique opportunity to evaluate the association between excess  
402 weight and the HDL system early in the spectrum of metabolic derangement and atherogenesis.  
403 In fact, this may especially be true given the low rates of insulin resistance and more favorable  
404 lipid profile and systemic inflammatory activity of our study's participants.

405 In conclusion, our study indicates that higher BMI, even in non-obese, non-diabetic  
406 individuals, is associated with decreased function of several protective activities of HDL. In  
407 individuals with increased BMI, HDL dysfunction is directly associated with increased

408 atherosclerotic burden. Antioxidant activity is found to be an exception increasing with BMI  
409 and it partially attenuated the atherosclerotic burden.



410 **Declaration of interest:** The authors declare no conflict of interest.

411 **Funding** The study was supported by São Paulo Research Foundation (FAPESP 2010/00201-8  
412 and FAPESP 2006/60585-9 and CNPq (471380/2008-13). JCLJ was supported by a doctoral  
413 grant from Coordination for the Improvement of Higher-Level Education Personnel (Capes  
414 grant number PROEX0092045). NBP was supported by a doctoral grant (number 2012/01645-  
415 2) from the Foundation for Research Support of the State of Sao Paulo (FAPESP). Prof Sposito  
416 was supported by a fellowship grant of productivity in research from the National Council for  
417 Scientific and Technological Development (CNPq) (grant number 301465/2017-7).

418 **Author contribution statement:** Jose Carlos de Lima-Junior drafted the manuscript and  
419 participated on the analysis of the data, Vitor W.M. Virginio participated on the experiments,  
420 Filipe A. Moura participated on the drafting of the manuscript and analysis of the data, Adriana  
421 Bertolami participated on the experiments, Marcelo Bertolami participated critically reviewing  
422 the manuscript, Wilson Nadruz participated critically reviewing the manuscript, Eliana Cota de  
423 Faria participated on the experiments and analysis of the data, Ilaria Zanotti participated  
424 critically reviewing the manuscript, Luiz Sergio F. de Carvalho participated on the analysis of  
425 the data and critically reviewing the manuscript, Andrei C Sposito participated on the analysis  
426 of the data and critically reviewing the manuscript

427 **Acknowledgements.** We thank Natalia B. Panzoldo from the University of Campinas for  
428 technical assistance in HDL functions experiments.

429

430

431           **5. References**

- 432 [1] D.K. Tobias, A. Pan, C.L. Jackson, E.J. O'Reilly, E.L. Ding, W.C. Willett, J.E. Manson, F.B. Hu,  
433 Body-mass index and mortality among adults with incident type 2 diabetes, *N Engl J Med*  
434 370(3) (2014) 233-44.
- 435 [2] A. Afshin, M.H. Forouzanfar, M.B. Reitsma, P. Sur, K. Estep, A. Lee, L. Marczak, A.H.  
436 Mokdad, M. Moradi-Lakeh, M. Naghavi, J.S. Salama, T. Vos, K.H. Abate, C. Abbafati, M.B.  
437 Ahmed, Z. Al-Aly, A. Alkerwi, R. Al-Raddadi, A.T. Amare, A. Amberbir, A.K. Amegah, E. Amini,  
438 S.M. Amrock, R.M. Anjana, J. Ärnlöv, H. Asayesh, A. Banerjee, A. Barac, E. Baye, D.A. Bennett,  
439 A.S. Beyene, S. Biadgilign, S. Biryukov, E. Bjertness, D.J. Boneya, I. Campos-Nonato, J.J. Carrero,  
440 P. Cecilio, K. Cercy, L.G. Ciobanu, L. Cornaby, S.A. Damtew, L. Dandona, R. Dandona, S.D.  
441 Dharmaratne, B.B. Duncan, B. Eshrati, A. Esteghamati, V.L. Feigin, J.C. Fernandes, T. Fürst, T.T.  
442 Gebrehiwot, A. Gold, P.N. Gona, A. Goto, T.D. Habtewold, K.T. Hadush, N. Hafezi-Nejad, S.I.  
443 Hay, M. Horino, F. Islami, R. Kamal, A. Kasaeian, S.V. Katikireddi, A.P. Kengne, C.N.  
444 Kesavachandran, Y.S. Khader, Y.H. Khang, J. Khubchandani, D. Kim, Y.J. Kim, Y. Kinfu, S. Kosen,  
445 T. Ku, B.K. Defo, G.A. Kumar, H.J. Larson, M. Leinsalu, X. Liang, S.S. Lim, P. Liu, A.D. Lopez, R.  
446 Lozano, A. Majeed, R. Malekzadeh, D.C. Malta, M. Mazidi, C. McAlinden, S.T. McGarvey, D.T.  
447 Mengistu, G.A. Mensah, G.B.M. Mensink, H.B. Mezgebe, E.M. Mirrakhimov, U.O. Mueller, J.J.  
448 Noubiap, C.M. Obermeyer, F.A. Ogbo, M.O. Owolabi, G.C. Patton, F. Pourmalek, M. Qorbani, A.  
449 Rafay, R.K. Rai, C.L. Ranabhat, N. Reinig, S. Safiri, J.A. Salomon, J.R. Sanabria, I.S. Santos, B.  
450 Sartorius, M. Sawhney, J. Schmidhuber, A.E. Schutte, M.I. Schmidt, S.G. Sepanlou, M.  
451 Shamsizadeh, S. Sheikhbahaei, M.J. Shin, R. Shiri, I. Shiue, H.S. Roba, D.A.S. Silva, J.I. Silverberg,  
452 J.A. Singh, S. Stranges, S. Swaminathan, R. Tabarés-Seisdedos, F. Tadese, B.A. Tedla, B.S.  
453 Tegegne, A.S. Terkawi, J.S. Thakur, M. Tonelli, R. Topor-Madry, S. Tyrovolas, K.N. Ukwaja, O.A.  
454 Uthman, M. Vaezghasemi, T. Vasankari, V.V. Vlassov, S.E. Vollset, E. Weiderpass, A.  
455 Werdecker, J. Wesana, R. Westerman, Y. Yano, N. Yonemoto, G. Yonga, Z. Zaidi, Z.M. Zenebe,  
456 B. Zipkin, C.J.L. Murray, G.O. Collaborators, Health Effects of Overweight and Obesity in 195  
457 Countries over 25 Years, *N Engl J Med* 377(1) (2017) 13-27.
- 458 [3] A.A. Khan, P.A. Mundra, N.E. Straznicki, P.J. Nestel, G. Wong, R. Tan, K. Huynh, T.W. Ng,  
459 N.A. Mellett, J.M. Weir, C.K. Barlow, Z.H. Alshehry, G.W. Lambert, B.A. Kingwell, P.J. Meikle,  
460 Weight Loss and Exercise Alter the High-Density Lipoprotein Lipidome and Improve High-  
461 Density Lipoprotein Functionality in Metabolic Syndrome, *Arterioscler Thromb Vasc Biol* 38(2)  
462 (2018) 438-447.
- 463 [4] F.M. Sacks, M.K. Jensen, From High-Density Lipoprotein Cholesterol to Measurements of  
464 Function: Prospects for the Development of Tests for High-Density Lipoprotein Functionality in  
465 Cardiovascular Disease, *Arterioscler Thromb Vasc Biol* 38(3) (2018) 487-499.
- 466 [5] T. Sasahara, P. Nestel, N. Fidge, D. Sviridov, Cholesterol transport between cells and high  
467 density lipoprotein subfractions from obese and lean subjects, *J Lipid Res* 39(3) (1998) 544-54.
- 468 [6] N. Attia, N. Fournier, B. Védie, M. Cambillau, P. Beaune, O. Ziegler, A. Grynberg, J.L. Paul, B.  
469 Guerci, Impact of android overweight or obesity and insulin resistance on basal and  
470 postprandial SR-BI and ABCA1-mediated serum cholesterol efflux capacities, *Atherosclerosis*  
471 209(2) (2010) 422-9.
- 472 [7] A.C. Sposito, HDL metrics, let's call the number thing off?, *Atherosclerosis* 251 (2016) 525-  
473 527.
- 474 [8] J.C. Levy, D.R. Matthews, M.P. Hermans, Correct homeostasis model assessment (HOMA)  
475 evaluation uses the computer program, *Diabetes Care* 21(12) (1998) 2191-2.
- 476 [9] A. Bertolami, J.C. de Lima-Júnior, R.M. Cintra, L.S. Carvalho, C.C. Gonzaga, M.L. Sulzbach,  
477 A.C.G.P. Petisco, J.E.M. Barbosa, A.A. Faludi, J. Plutzky, M.C. Bertolami, A.C. Sposito,  
478 Adiponectin concentration data improve the estimation of atherosclerotic risk in normal and in  
479 overweight subjects, *Clin Endocrinol (Oxf)* (2017).

- 480 [10] J.H. Stein, C.E. Korcarz, R.T. Hurst, E. Lonn, C.B. Kendall, E.R. Mohler, S.S. Najjar, C.M.  
481 Rembold, W.S. Post, F. American Society of Echocardiography Carotid Intima-Media Thickness  
482 Task, Use of carotid ultrasound to identify subclinical vascular disease and evaluate  
483 cardiovascular disease risk: a consensus statement from the American Society of  
484 Echocardiography Carotid Intima-Media Thickness Task Force. Endorsed by the Society for  
485 Vascular Medicine, *Journal of the American Society of Echocardiography* : official publication  
486 of the American Society of Echocardiography 21(2) (2008) 93-111; quiz 189-90.
- 487 [11] M.W. Lorenz, S. von Kegler, H. Steinmetz, H.S. Markus, M. Sitzer, Carotid intima-media  
488 thickening indicates a higher vascular risk across a wide age range: prospective data from the  
489 Carotid Atherosclerosis Progression Study (CAPS), *Stroke* 37(1) (2006) 87-92.
- 490 [12] M.J. Chapman, S. Goldstein, D. Lagrange, P.M. Laplaud, A density gradient ultracentrifugal  
491 procedure for the isolation of the major lipoprotein classes from human serum, *J Lipid Res*  
492 22(2) (1981) 339-58.
- 493 [13] E.S. Lima, R.C. Maranhao, Rapid, simple laser-light-scattering method for HDL particle  
494 sizing in whole plasma, *Clin Chem* 50(6) (2004) 1086-8.
- 495 [14] L. Lagrost, Determination of the mass concentration and the activity of the plasma  
496 cholesteryl ester transfer protein (CETP), *Methods Mol Biol* 110 (1998) 231-41.
- 497 [15] M. Jauhainen, C. Ehnholm, Determination of human plasma phospholipid transfer protein  
498 mass and activity, *Methods* 36(2) (2005) 97-101.
- 499 [16] C. Ehnholm, T. Kuusi, Preparation, characterization, and measurement of hepatic lipase,  
500 *Methods Enzymol* 129 (1986) 716-38.
- 501 [17] J.W. Chisholm, A.K. Gebre, J.S. Parks, Characterization of C-terminal histidine-tagged  
502 human recombinant lecithin:cholesterol acyltransferase, *J Lipid Res* 40(8) (1999) 1512-9.
- 503 [18] D.Z. Scherrer, V.H. Zago, I.C. Vieira, E.S. Parra, N.B. Panzoldo, F. Alexandre, R. Secolin, J.  
504 Baracat, E.C. Quintão, E.C. Faria, p.Q192R SNP of PON1 seems not to be Associated with  
505 Carotid Atherosclerosis Risk Factors in an Asymptomatic and Normolipidemic Brazilian  
506 Population Sample, *Arq Bras Cardiol* 105(1) (2015) 45-52.
- 507 [19] M. Navab, S.Y. Hama, G.P. Hough, G. Subbanagounder, S.T. Reddy, A.M. Fogelman, A cell-  
508 free assay for detecting HDL that is dysfunctional in preventing the formation of or inactivating  
509 oxidized phospholipids, *J Lipid Res* 42(8) (2001) 1308-17.
- 510 [20] C. Besler, K. Heinrich, L. Rohrer, C. Doerries, M. Riwanto, D.M. Shih, A. Chroni, K.  
511 Yonekawa, S. Stein, N. Schaefer, M. Mueller, A. Akhmedov, G. Daniil, C. Manes, C. Templin, C.  
512 Wyss, W. Maier, F.C. Tanner, C.M. Matter, R. Corti, C. Furlong, A.J. Lusis, A. von Eckardstein,  
513 A.M. Fogelman, T.F. Luscher, U. Landmesser, Mechanisms underlying adverse effects of HDL  
514 on eNOS-activating pathways in patients with coronary artery disease, *J Clin Invest* 121(7)  
515 (2011) 2693-708.
- 516 [21] A. Machado-Lima, R.T. Iborra, R.S. Pinto, C.H. Sartori, E.R. Oliveira, E.R. Nakandakare, J.T.  
517 Stefano, D. Giannella-Neto, M.L. Correa-Giannella, M. Passarelli, Advanced glycated albumin  
518 isolated from poorly controlled type 1 diabetes mellitus patients alters macrophage gene  
519 expression impairing ABCA-1-mediated reverse cholesterol transport, *Diabetes Metab Res Rev*  
520 29(1) (2013) 66-76.
- 521 [22] M. Valiyaveetil, N. Kar, M.Z. Ashraf, T.V. Byzova, M. Febbraio, E.A. Podrez, Oxidized high-  
522 density lipoprotein inhibits platelet activation and aggregation via scavenger receptor BI, *Blood*  
523 111(4) (2008) 1962-71.
- 524 [23] G. Silbernagel, B. Schottker, S. Appelbaum, H. Scharnagl, M.E. Kleber, T.B. Grammer, A.  
525 Ritsch, U. Mons, B. Holleczeck, G. Goliash, A. Niessner, B.O. Boehm, R.B. Schnabel, H. Brenner,  
526 S. Blankenberg, U. Landmesser, W. Marz, High-density lipoprotein cholesterol, coronary artery  
527 disease, and cardiovascular mortality, *Eur Heart J* 34(46) (2013) 3563-71.
- 528 [24] D. Saleheen, R. Scott, S. Javad, W. Zhao, A. Rodrigues, A. Picataggi, D. Lukmanova, M.L.  
529 Mucksavage, R. Luben, J. Billheimer, J.J. Kastelein, S.M. Boekholdt, K.T. Khaw, N. Wareham,  
530 D.J. Rader, Association of HDL cholesterol efflux capacity with incident coronary heart disease  
531 events: a prospective case-control study, *Lancet Diabetes Endocrinol* 3(7) (2015) 507-13.

- 532 [25] E.S. Parra, N.B. Panzoldo, V.H. Zago, D.Z. Scherrer, F. Alexandre, J. Bakkarat, V.S. Nunes,  
533 E.R. Nakandakare, E.C. Quintao, W. Nadruz, Jr., E.C. de Faria, A.C. Sposito, HDL size is more  
534 accurate than HDL cholesterol to predict carotid subclinical atherosclerosis in individuals  
535 classified as low cardiovascular risk, *PLoS One* 9(12) (2014) e114212.
- 536 [26] M. de la Llera Moya, F.C. McGillicuddy, C.C. Hinkle, M. Byrne, M.R. Joshi, V. Nguyen, J.  
537 Tabita-Martinez, M.L. Wolfe, K. Badellino, L. Pruscino, N.N. Mehta, B.F. Asztalos, M.P. Reilly,  
538 Inflammation modulates human HDL composition and function in vivo, *Atherosclerosis* 222(2)  
539 (2012) 390-4.
- 540 [27] T. Arai, S. Yamashita, K. Hirano, N. Sakai, K. Kotani, S. Fujioka, S. Nozaki, Y. Keno, M.  
541 Yamane, E. Shinohara, Increased plasma cholesteryl ester transfer protein in obese subjects. A  
542 possible mechanism for the reduction of serum HDL cholesterol levels in obesity, *Arterioscler*  
543 *Thromb* 14(7) (1994) 1129-36.
- 544 [28] C.F. Ebenbichler, M. Laimer, S. Kaser, A. Ritsch, A. Sandhofer, H. Weiss, F. Aigner, J.R.  
545 Patsch, Relationship between cholesteryl ester transfer protein and atherogenic lipoprotein  
546 profile in morbidly obese women, *Arterioscler Thromb Vasc Biol* 22(9) (2002) 1465-9.
- 547 [29] C.P.J. Talbot, J. Plat, P.J. Joris, M. Konings, Y.H.A.M. Kusters, C.G. Schalkwijk, A. Ritsch, R.P.  
548 Mensink, HDL cholesterol efflux capacity and cholesteryl ester transfer are associated with  
549 body mass, but are not changed by diet-induced weight loss: A randomized trial in abdominally  
550 obese men, *Atherosclerosis* 274 (2018) 23-28.
- 551 [30] B. Shao, C. Tang, A. Sinha, P.S. Mayer, G.D. Davenport, N. Brot, M.N. Oda, X.Q. Zhao, J.W.  
552 Heinecke, Humans with atherosclerosis have impaired ABCA1 cholesterol efflux and enhanced  
553 high-density lipoprotein oxidation by myeloperoxidase, *Circ Res* 114(11) (2014) 1733-42.
- 554 [31] L.H. Bogl, S.M. Kaye, J.T. Ramo, A.J. Kangas, P. Soininen, A. Hakkarainen, J. Lundbom, N.  
555 Lundbom, A. Ortega-Alonso, A. Rissanen, M. Ala-Korpela, J. Kaprio, K.H. Pietilainen, Abdominal  
556 obesity and circulating metabolites: A twin study approach, *Metabolism* 65(3) (2016) 111-21.
- 557 [32] K. Bhaskaran, I. Dos-Santos-Silva, D.A. Leon, I.J. Douglas, L. Smeeth, Association of BMI  
558 with overall and cause-specific mortality: a population-based cohort study of 3.6 million adults  
559 in the UK, *Lancet Diabetes Endocrinol* (2018).
- 560 [33] L.S. Carvalho, V.W. Virginio, N.B. Panzoldo, V.N. Figueiredo, S.N. Santos, R.G. Modolo, J.M.  
561 Andrade, E.S.J.C. Quinaglia, W. Nadruz-Junior, E.C. de Faria, A.C. Sposito, G. Brasilia Heart  
562 Study, Elevated CETP activity during acute phase of myocardial infarction is independently  
563 associated with endothelial dysfunction and adverse clinical outcome, *Atherosclerosis* 237(2)  
564 (2014) 777-83.
- 565 [34] A. Pirillo, A.L. Catapano, G.D. Norata, HDL in infectious diseases and sepsis, *Handb Exp*  
566 *Pharmacol* 224 (2015) 483-508.
- 567 [35] A. Kontush, S. Chantepie, M.J. Chapman, Small, dense HDL particles exert potent  
568 protection of atherogenic LDL against oxidative stress, *Arterioscler Thromb Vasc Biol* 23(10)  
569 (2003) 1881-8.
- 570 [36] F. Santilli, N. Vazzana, R. Liani, M.T. Guagnano, G. Davi, Platelet activation in obesity and  
571 metabolic syndrome, *Obes Rev* 13(1) (2012) 27-42.

572

573

574 **Figure 1. 3D surface plot showing the association between BMI, cIMT, and HDL**  
575 **variables.** This surface plot displays an image based on the relationship between the BMI and  
576 HDL variables as predictors on the x- and y-axes and a continuous surface that represents the  
577 cIMT values on the z-axis. The peak on the plot corresponds with the yellow color and the  
578 highest value obtained to cIMT using the combination of X and Y that produce the maxima  
579 cIMT, which occurs at approximately 0.8mm. The valley corresponds with blue color and the  
580 combination of X and Y that produce the minima cIMT. Figure 1A, HDL-C values. Figure 1B,  
581 HDL size. Figure 1C, CEC values. Figure 1D, antioxidant activity of HDL. HDL-C, high-  
582 density lipoprotein cholesterol in mg/dL. BMI, body mass index in  $\text{kg}/\text{m}^2$ . CEC is expressed as  
583 a percentage of efflux in the sample, normalized to a reference sample. Antioxidant activity is  
584 expressed in % as inhibition of LDL oxidation in the presence of each subject's HDL oxidation.  
585 **Figure 2. Polynomial splines showing the associations between BMI, cIMT and HDL**  
586 **variables.** 2A, CEC according to BMI values. 2B, Antioxidant activity according to BMI  
587 values. 2C, compound variable (Z-Efflux + Z-Antioxidant activity) according to BMI values.  
588 2D, cIMT values according to compound variable (Z-Efflux + Z-Antioxidant activity). Gray  
589 shading indicates 95% confidence intervals.

590

591

592

593

594

595

596

597

598

599

600

601

602 **Table 1.** Clinical characteristics according to BMI groups

|                                 | <b>BMI categories (kg/m<sup>2</sup>)</b> |                         |                            | <i>p-value</i> |
|---------------------------------|------------------------------------------|-------------------------|----------------------------|----------------|
|                                 | <b>&lt;22</b>                            | <b>22-24.99</b>         | <b>25-30</b>               |                |
| <b>Sample size</b>              | 186                                      | 264                     | 449                        |                |
| <b>BMI, kg/m<sup>2</sup></b>    | 20.6 (1.8)                               | 23.6 (1.6) <sup>a</sup> | 28 (4.6) <sup>b,c</sup>    | <0.0001        |
| <b>Waist circumference, cm</b>  | 68 (9)                                   | 75 (11) <sup>a</sup>    | 94 (19) <sup>b,c</sup>     | <0.0001        |
| <b>Age, yr</b>                  | 38 (24)                                  | 45.5 (26) <sup>a</sup>  | 54 (16) <sup>b</sup>       | 0.003          |
| <b>Male sex, %</b>              | 43.5                                     | 44.7                    | 39.6                       | 0.369          |
| <b>Hypertension, %</b>          | 28.6                                     | 31.3                    | 28.3                       | 0.915          |
| <b>Glucose, mg/dL</b>           | 81 (12.0)                                | 86 (14.0) <sup>a</sup>  | 105 (62.0) <sup>b,c</sup>  | <0.0001        |
| <b>Insulin, μU/mL</b>           | 3.0 (2.5)                                | 4.7 (4.9) <sup>a</sup>  | 10.2 (8.2) <sup>b,c</sup>  | <0.0001        |
| <b>HOMA2 % β</b>                | 61.9 (38.2)                              | 61.3 (49.4)             | 64.9 (51.3) <sup>b,c</sup> | 0.008          |
| <b>HOMA2 %S</b>                 | 241.7 (210.3)                            | 161.2 (183.5)           | 68.8 (62.5) <sup>b,c</sup> | <0.0001        |
| <b>HOMA2-IR</b>                 | 0.46 (0.4)                               | 0.51 (0.5)              | 0.66 (0.5) <sup>b,c</sup>  | <0.0001        |
| <b>CRP, mg/dL</b>               | 0.42 (0.9)                               | 0.70 (1.1)              | 0.51 (1.0)                 | 0.453          |
| <b>Triglycerides, mg/dL</b>     | 66 (34)                                  | 81 (46) <sup>a</sup>    | 118 (87) <sup>b,c</sup>    | <0.0001        |
| <b>LDL-C, mg/dL</b>             | 95 (40)                                  | 104 (34) <sup>a</sup>   | 107 (42) <sup>b</sup>      | <0.0001        |
| <b>Total cholesterol, mg/dL</b> | 175 (53)                                 | 181 (50)                | 187 (55) <sup>b,c</sup>    | < 0.0001       |
| <b>ApoA-I, mg/dL</b>            | 148 (53)                                 | 142 (46)                | 137 (38) <sup>b,c</sup>    | <0.0001        |
| <b>ApoB, mg/dL</b>              | 72 (23)                                  | 81 (27) <sup>a</sup>    | 90 (31) <sup>b</sup>       | <0.0001        |
| <b>HDL-C, mg/dL</b>             | 63 (29)                                  | 52 (30) <sup>a</sup>    | 45 (19) <sup>b,c</sup>     | <0.0001        |

|                 |             |                          |                            |          |
|-----------------|-------------|--------------------------|----------------------------|----------|
| <b>cIMT, mm</b> | 0.55 (0.20) | 0.60 (0.20) <sup>a</sup> | 0.70 (0.24) <sup>b,c</sup> | < 0.0001 |
|-----------------|-------------|--------------------------|----------------------------|----------|

603

604 All continuous variables are expressed as medians and interquartile ranges, and categorical  
605 variables as percentages. Comparisons between groups were analyzed with Jonckheere–  
606 Terpstra’s for ordered alternatives with pairwise comparisons, or Chi-Square test for the  
607 categorical variables. To convert the values for glucose to millimoles per liter, divide by 18.  
608 To convert the values for insulin to picomoles per liter, multiply by 6.945. To convert the  
609 values for cholesterol to millimoles per liter, multiply by 0.02586. To convert the values for  
610 triglycerides to millimoles per liter, multiply by 0.01129. <sup>a</sup>BMI 22 – 24.9 vs BMI <22; <sup>b</sup>BMI  
611 >25 vs 22 – 24.9; <sup>c</sup>BMI > 25 vs BMI < 22. Significant p-value < 0.05.

612

613

614

615

616

617

618

619

620

621

622

623

624

625

626

627

628

629 **Table 2.** Subgroup clinical characteristics according to BMI groups

| <b>BMI categories (kg/m<sup>2</sup>)</b> |               |                   |                               |                                  |                   |
|------------------------------------------|---------------|-------------------|-------------------------------|----------------------------------|-------------------|
|                                          | <b>&lt;22</b> | <b>22-24.99</b>   | <b>25-30</b>                  | <b><i>p-value</i></b>            |                   |
| <b>Sample size</b>                       | 34            | 47                | 20                            |                                  |                   |
| <b>BMI, kg/m<sup>2</sup></b>             |               | <b>20.0 (2.5)</b> | <b>23.5 (1.6)<sup>a</sup></b> | <b>26.7 (2.55)<sup>b,c</sup></b> | <b>&lt;0.0001</b> |
| <b>Waist circumference, cm</b>           |               | 65.0 (7.0)        | 75.5 (13.2) <sup>a</sup>      | 84.0 (10.5) <sup>b,c</sup>       | <0.0001           |
| <b>Age, yr</b>                           |               | 42 (21)           | 39 (20.7)                     | 47 (9.5)                         | 0.24              |
| <b>Male sex, %</b>                       |               | 33.7              | 46.5                          | 19.8                             | 0.47              |
| <b>Glucose, mg/dL</b>                    |               | 80.0 (8.0)        | 83.0 (9.2)                    | 86.0 (11.5) <sup>b</sup>         | 0.012             |
| <b>Insulin, μU/mL</b>                    |               | 2.5 (2.0)         | 4.3 (4.0) <sup>a</sup>        | 5.8 (6.0) <sup>b,c</sup>         | <0.0001           |
| <b>HOMA2 % β</b>                         |               | 58.4 (37.8)       | 69.0 (45.9)                   | 84.9 (38.7) <sup>b</sup>         | <0.0001           |
| <b>HOMA2 %S</b>                          |               | 303.2 (261.6)     | 228.2 (221.9) <sup>a</sup>    | 148.2 (75.1) <sup>b,c</sup>      | <0.0001           |
| <b>HOMA2-IR</b>                          |               | 0.3 (0.3)         | 0.4 (0.5) <sup>a</sup>        | 0.7 (0.5) <sup>b,c</sup>         | <0.0001           |
| <b>CRP, mg/dL</b>                        |               | 0.9 (1.5)         | 0.71 (1.2)                    | 0.6 (1.2)                        | 0.51              |
| <b>Triglycerides, mg/dL</b>              |               | 57.0 (27.2)       | 70.0 (29.0)                   | 123.5 (72.7) <sup>b,c</sup>      | <0.0001           |
| <b>LDL-C, mg/dL</b>                      |               | 98.0 (30.5)       | 100.0 (34.0)                  | 101.0 (28.5)                     | 0.57              |
| <b>Total cholesterol, mg/dL</b>          |               | 181.0 (48.7)      | 169.0 (42.0)                  | 173.0 (34.5)                     | 0.13              |
| <b>ApoA-I, mg/dL</b>                     |               | 176.0 (61.2)      | 147.0 (53.0)                  | 111.0 (57.2) <sup>b,c</sup>      | <0.0001           |
| <b>ApoB, mg/dL</b>                       |               | 73.7 (24.3)       | 81.3 (26.1)                   | 81.7 (22.3) <sup>b</sup>         | 0.04              |
| <b>HDL-C, mg/dL</b>                      |               | 72.5 (39.0)       | 49.0 (52.0) <sup>a</sup>      | 32.5 (15.0) <sup>b,c</sup>       | <0.0001           |
| <b>cIMT, mm</b>                          |               | 0.55 (0.2)        | 0.58 (0.2)                    | 0.67 (0.5)                       | 0.05              |



630

631 All continuous variables are expressed as medians and interquartile ranges, and categorical  
632 variables as percentages. Comparisons between groups were analyzed with Jonckheere–  
633 Terpstra’s for ordered alternatives with pairwise comparisons, or Chi-Square test for the  
634 categorical variables. To convert the values for glucose to millimoles per liter, divide by 18.  
635 To convert the values for insulin to picomoles per liter, multiply by 6.945. To convert the  
636 values for cholesterol to millimoles per liter, multiply by 0.02586. To convert the values for  
637 triglycerides to millimoles per liter, multiply by 0.01129. <sup>a</sup>BMI 22 – 24.9 vs BMI <22; <sup>b</sup>BMI  
638 >25 vs 22 – 24.9; <sup>c</sup>BMI > 25 vs BMI < 22. Significant p-value < 0.05.

639

640

641

642

643

644

645

646

647

648

649

650

651

652

653

654

655

656 **Table 3.** HDL characterization

|                                          | <b>BMI categories (kg/m<sup>2</sup>)</b> |                         |                          | <i>p-value</i> |
|------------------------------------------|------------------------------------------|-------------------------|--------------------------|----------------|
|                                          | <b>&lt;22</b>                            | <b>22-24.99</b>         | <b>25-30</b>             |                |
| <b>Sample size</b>                       | 34                                       | 47                      | 20                       |                |
| <b>Total mass, mg/dL</b>                 | 198.8 (91)                               | 182.3 (98)              | 155 (99) <sup>c</sup>    | 0.024          |
| <b>Triglycerides, mg/dL</b>              | 9.8 (6.0)                                | 7.8 (4.0)               | 8.3 (6)                  | 0.047          |
| <b>Free cholesterol, mg/dL</b>           | 8.0 (6.0)                                | 6.3 (4.0) <sup>a</sup>  | 5.3 (3.0) <sup>c</sup>   | 0.001          |
| <b>Cholesteryl ester, mg/dL</b>          | 60.1 (35)                                | 52.9 (46)               | 39.7 (26) <sup>c</sup>   | 0.004          |
| <b>Phospholipids, mg/dL</b>              | 35.1 (19)                                | 29.2 (14) <sup>a</sup>  | 24.7 (13) <sup>c</sup>   | <0.0001        |
| <b>ApoA-I, mg/dL</b>                     | 86.1 (40)                                | 86.1 (48)               | 76.9 (39)                | 0.578          |
| <b>Total proteins, mg/dL</b>             | 135.5 (71.5)                             | 143.6 (74)              | 147.0<br>(54.0)          | 0.777          |
| <b>HDL size, nm</b>                      | 7.9 (0.9)                                | 7.8 (0.9)               | 7.6 (0.8) <sup>b,c</sup> | <0.0001        |
| <b>Zeta potential, mV</b>                | -7.7 (5)                                 | -6.4 (4)                | -7.8 (9)                 | 0.297          |
| <b>CETP, %</b>                           | 10.1 (6.4)                               | 10.6 (7.3)              | 10.7 (6.3)               | 0.612          |
| <b>PLTP, μmol PC/mL/h</b>                | 5.7 (2.9)                                | 6.0 (3.2)               | 5.4 (3.5)                | 0.338          |
| <b>LCAT, nmol CE/mL/h</b>                | 17.4 (15)                                | 16.6 (12)               | 16.9 (19)                | 0.454          |
| <b>LPL, μmol FFA/mL/h</b>                | 4.0 (3.4)                                | 3.7 (3.7)               | 3.2 (2.9)                | 0.157          |
| <b>HL, μmol FFA/mL/h</b>                 | 4.9 (4.0)                                | 5.8 (4.4)               | 5.8 (4.5)                | 0.440          |
| <b>PON/HDL-C,<br/>(mmol/min)/(mg/dL)</b> | 0.40 (0.5)                               | 0.50 (0.7) <sup>a</sup> | 0.54 (0.7) <sup>c</sup>  | <0.001         |

657

658 All continuous variables are expressed as medians and interquartile ranges. To convert values  
659 for cholesterol to millimoles per liter, multiply by 0.02586. To convert values for triglycerides  
660 to millimoles per liter, multiply by 0.01129. <sup>a</sup>BMI 22 – 24.9 vs BMI <22; <sup>b</sup>BMI >25 vs 22 –  
661 24.9; <sup>c</sup>BMI > 25 vs BMI < 22. Significant p-value < 0.05.

662

663

664

665

666

667

668

669

670

671

672

673

674

675

676

677

678

679

680

681

682

683

684

685

686 Table 4. Linear regression analyses between HDL functions and cIMT

| Independent variable             | Unstandardized $\beta$ | Standardized $\beta$ | Lower CI 95% | Upper CI 95% | <i>p</i> -value |
|----------------------------------|------------------------|----------------------|--------------|--------------|-----------------|
| Antioxidant activity             |                        |                      |              |              |                 |
| Unadjusted                       |                        |                      |              |              |                 |
| Adjusted <sup>a</sup>            | -0.001                 | -0.153               | -0.003       | 0.000        | 0.128           |
|                                  | -0.002                 | -0.196               | -0.003       | 0.000        | 0.038           |
| CEC                              |                        |                      |              |              |                 |
| Unadjusted                       | -0.016                 | -0.260               | -0.028       | -0.004       | 0.009           |
| Adjusted <sup>a</sup>            | -0.012                 | -0.188               | -0.023       | 0.000        | 0.047           |
| PON/HDL-C                        |                        |                      |              |              |                 |
| Unadjusted                       | -0.010                 | -0.063               | -0.079       | 0.024        | 0.301           |
| Adjusted <sup>a</sup>            | -0.045                 | -0.061               | -0.071       | 0.019        | 0.254           |
| Anti-inflammatory activity       |                        |                      |              |              |                 |
| Unadjusted                       | 0.000                  | -0.043               | -0.003       | 0.002        | 0.676           |
| Adjusted <sup>a</sup>            | 0.000                  | -0.004               | -0.002       | 0.002        | 0.963           |
| HDL-mediated platelet inhibition |                        |                      |              |              |                 |
| Unadjusted                       | 0.002                  | 0.164                | 0.000        | 0.004        | 0.120           |
| Adjusted <sup>a</sup>            | 0.002                  | 0.177                | 0.000        | 0.004        | 0.068           |

<sup>b</sup> Adjusted for age, sex, BMI, HDL-C and insulin. In order to compare effects across different HDL functions we provided the standardized coefficients.

687

688

689

690

A.

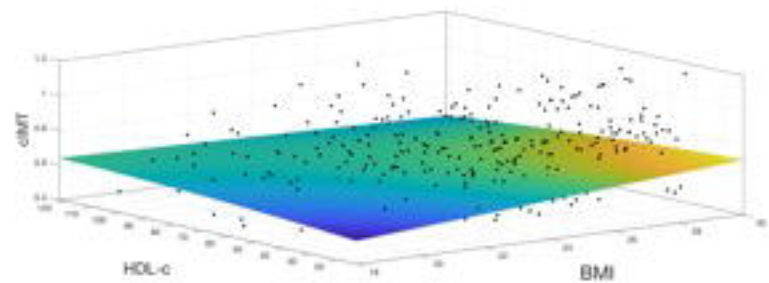

B.

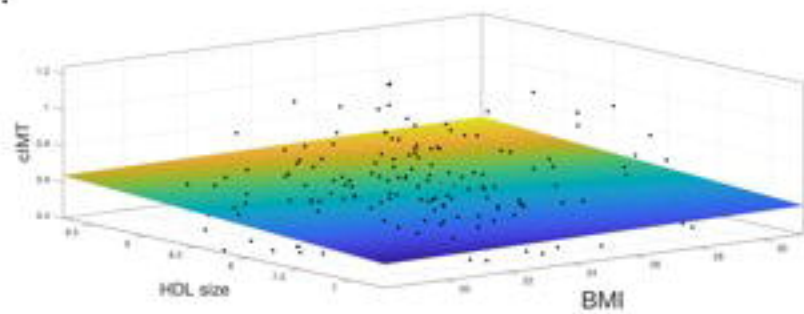

C.

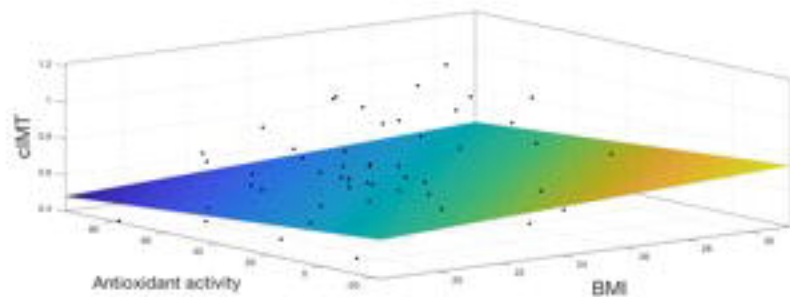

D.

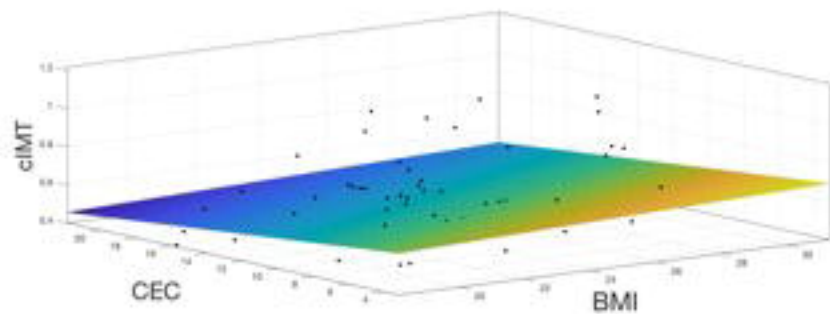

**A** Smoothing spline with 3 df selected by cross validation;  $R^2 = 0.19$

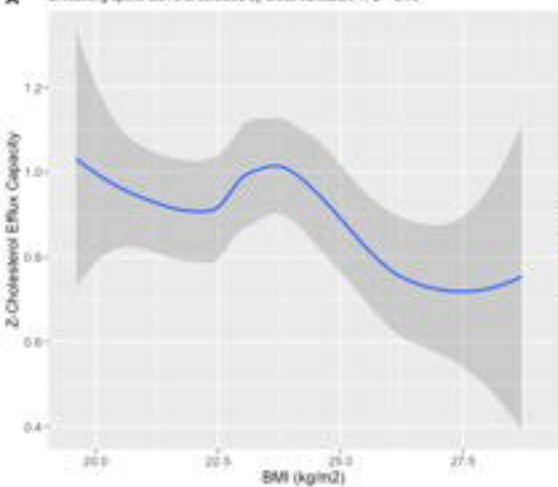

**B** Smoothing spline with 3 df selected by cross validation;  $R^2 = 0.12$

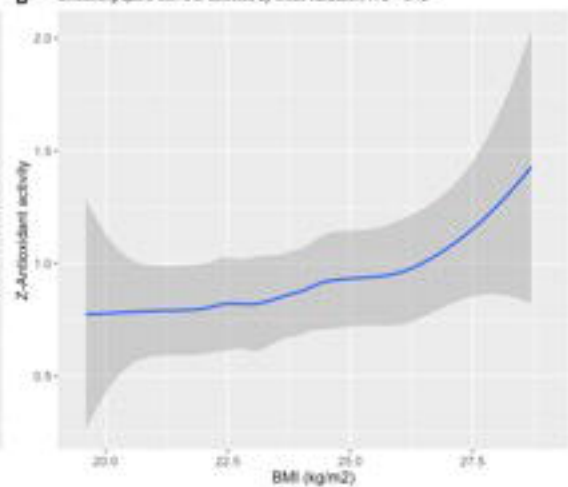

**C** Smoothing spline with 2 df selected by cross validation;  $R^2 = 0.05$

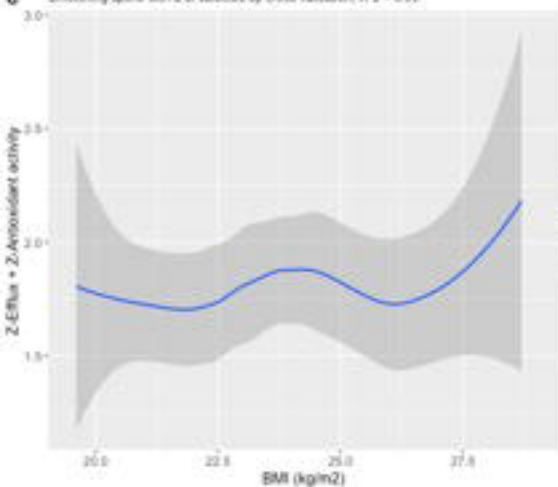

**D** Smoothing spline with 4 df selected by cross validation;  $R^2 = 0.25$

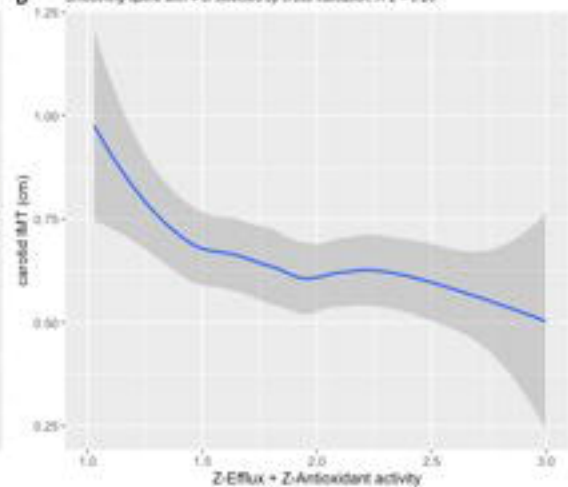

Source: https://www.medrxiv.org/content/medrxiv/early/2019/07/24/19002899.full.pdf
